# Supplementary material for: A difluorobenzothiadiazole-based conjugated polymer with alkylthiophene as the side chains for efficient, additive-free and thick-film polymer solar cells
Source: Royal Society of Chemistry journal article supplement (doi:10.1039/c7ta06332f), 2017-01-01
Supplement: c7ta06332f1.pdf [file c7ta06332f1.pdf]

## Electronic Supplementary Information

### **A difluorobenzothiadiazole-based conjugated polymer with alkylthiophene as the side chains for efficient, additive-free and thick-film polymer solar cells**

Mu He, §<sup>a, d</sup> Miaomiao Li, §<sup>b, c</sup> Xin Dong,<sup>a, d</sup> Hongkun Tian,<sup>\*a</sup> Hui Tong,<sup>\*a</sup> Jun Liu,<sup>a</sup> Zhiyuan Xie,<sup>a</sup> Yanhou Geng<sup>\*a, b, c</sup> and Fosong Wang<sup>a</sup>

§ M.M. Li and Y.T. Liu contributed equally to this work.

<sup>a</sup> State Key Laboratory of Polymer Physics and Chemistry, Changchun Institute of Applied Chemistry, Chinese Academy of Sciences, Changchun, 130022, P. R. China.

\*E-mail: yanhou.geng@tju.edu.cn; hktian@ciac.ac.cn; chemtonghui@ciac.ac.cn

<sup>b</sup> School of Materials Science and Engineering and Tianjin Key Laboratory of Molecular Optoelectronic Science, Tianjin University, Tianjin 300072, P. R. China.

<sup>c</sup> Collaborative Innovation Center of Chemical Science and Engineering (Tianjin), Tianjin University, Tianjin 300072, P. R. China.

<sup>d</sup> University of Chinese Academy of Sciences, Beijing, 100049, P. R. China.

## Instruments

$^1\text{H}$  NMR and  $^{13}\text{C}$  NMR solution spectra were recorded on a Bruker AV (400 MHz for  $^1\text{H}$ , 100 MHz for  $^{13}\text{C}$  and 376 MHz for  $^{19}\text{F}$ ) spectrometer with chloroform-d ( $\text{CDCl}_3$ , tetramethylsilane (TMS) as an internal standard), methylene chloride-d<sub>2</sub> ( $\text{CD}_2\text{Cl}_2$ , TMS as an internal standard) or 1,1,2,2-tetrachloroethane-d<sub>2</sub> ( $\text{C}_2\text{Cl}_4\text{D}_2$ ) as solvent. Matrix-assisted laser desorption ionization time-of-flight (MALDI-TOF) mass spectra were measured on a Bruker/AutoflexIII Smartbean MALDI mass spectrometer with 2-[(2*E*)-3-(4-*t*-butylphenyl)-2-methylprop-2-enylidene]malononitrile (DCTB) as the matrix in a reflection mode. The molecular weight of polymers was determined via high-temperature gel permeation chromatography (GPC) on a PL-GPC 220 system at 150 °C, with 1,2,4-trichlorobenzene as eluent and monodisperse polystyrene as standard. UV-Vis absorption spectra were recorded on a Shimadzu UV3600 UV-vis-NIR spectrometer. The optical band gap was calculated according to the absorption onset of spectra ( $E_g^{opt} = 1240/\lambda_{onset}$  eV). Cyclic voltammetry (CV) measurements were carried out on a CHI660a electrochemical workstation at a scan rate of 100 mV s<sup>-1</sup>. The CV cell consisted of glassy carbon electrode (diameter of 1 cm) as working electrode, saturated calomel electrode as reference electrode and platinum wire as counter electrode.  $\text{NBu}_4\text{PF}_6$  (0.1M) in anhydrous acetonitrile was used as electrolyte. To extract the energy levels of polymer films, the potential was calibrated against ferrocene/ferrocenium ( $\text{Fc}/\text{Fc}^+$ ). HOMO and LUMO energy levels were calculated by the equations:  $\text{HOMO} = -(4.80 + E_{onset}^{ox})$  eV and  $\text{LUMO} = -(4.80 + E_{onset}^{re})$  eV, in which  $E_{onset}^{ox}$  and  $E_{onset}^{re}$  are oxidation and reduction onsets versus the half potential of

Fc/Fc<sup>+</sup>, respectively. TGA was performed at a heating rate of 10 °C min<sup>-1</sup> under nitrogen flow on a PerkinElmer TGA7. DSC was carried out on a PerkinElmer DSC 7 with a heating/cooling rate of ±10 °C min<sup>-1</sup> under nitrogen flow. Two-dimensional grazing-incidence wide angle X-ray scattering (2D-GIWAXS) was measured at Shanghai Synchrotron Radiation Facility (SSRF) on beam line BL14B1 ( $\lambda = 0.0689$  nm) with a MarCCD area detector at incidence angle of 0.16°. Atomic force microscopy (AFM) measurements were carried out in tapping mode on a SPA400HV instrument with a SPI 3800 controller (Seiko Instruments). Transmission electron microscopy (TEM) images were recorded on a JEM-1011 transmission electron microscope with accelerating voltage of 100 KV and camera length of 160 cm.

### **Fabrication and characterization of PSC devices**

PSC devices with a device configuration of ITO/ PEDOT:PSS (~40 nm)/polymer:PC<sub>71</sub>BM /PFN (~5 nm)/Al (100 nm) were fabricated. Pre-patterned indium tin oxide (ITO) coated glass substrates were cleaned sequentially with detergent, deionized water, acetone and isopropanol in ultra-sonication, followed by drying at 120 °C for 30 min and ultraviolet/ozone treatment for 25 min. PEDOT:PSS layer (Baytron P Al 4083) with thickness of ~40 nm was prepared via spin-coating on the ITO-glass substrates at 5000 r.p.m. for 40 s. After baking at 120 °C for 30 min, the substrates were transferred into glovebox under N<sub>2</sub> atmosphere. Polymer:PC<sub>71</sub>BM solutions were prepared in *o*-DCB as solvent (polymer concentration: 11 mg/mL for both **P-2T** and **P-TT**) and were stirred on a hotplate (~ 115 °C) for at least 4 h in N<sub>2</sub>

glovebox. Before spin coating, both the solutions and the substrates were pre-heated on a hotplate (at 90 °C for **P-2T** and 110 °C for **P-TT**). Active layers were spin coated from the warm solutions on the pre-heated substrates in N<sub>2</sub> glovebox. After the active layers were dried under low vacuum (< 10 Pa) for 30 min, PFN layer with thickness of ~ 5 nm was spin coated from a MeOH solution (concentration: 0.25 mg/mL) on active layer at 3000 r.p.m. for 30 s. Finally, Al layer with thickness of 100 nm was deposited by thermal evaporation at the pressure of ~ 2 × 10<sup>-4</sup> Pa in a vacuum chamber. The active area of devices is 8 mm<sup>2</sup>. Keithley 2400 source meter was used to measure *J-V* curves under 100 mW cm<sup>-2</sup> AM 1.5G simulated solar light illumination provided by a XES-40S2-CE Class Solar Simulator (Japan, SAN-EI Electric Co., Ltd.) in a glove box. EQE curves were detected on a QE-R3011IPCE measurement system (Enli Technology Co. Ltd).

### **SCLC measurement**

The charge carrier mobilities of blend films were measured using the SCLC method. Hole-only and electron-only devices were fabricated with configuration of ITO/PEDOT:PSS (40 nm)/active layer (300 nm)/MoO<sub>3</sub> (10 nm)/Al (100 nm) and ITO/PEIE (10 nm)/active layer (300 nm)/PFN (5 nm)/Al (100 nm) respectively. The devices were measured using Keithley 2400 source meter in the dark and the charge carrier mobilities were calculated by fitting the results using a space-charge limited function<sup>1</sup>:

$$J = \frac{9}{8} \varepsilon_0 \varepsilon_r \mu \frac{V^2}{L^3} \exp\left[-\frac{0.89\beta\sqrt{V}}{\sqrt{L}}\right]$$

Where  $J$  is the dark current density,  $\epsilon_0$  is the permittivity of free space,  $\epsilon_r$  is the dielectric constant and is assumed to be 3 in our analysis,  $\mu$  is the charge carrier mobility,  $V$  is the voltage drop across the device and  $L$  is the thickness of the blend layer.

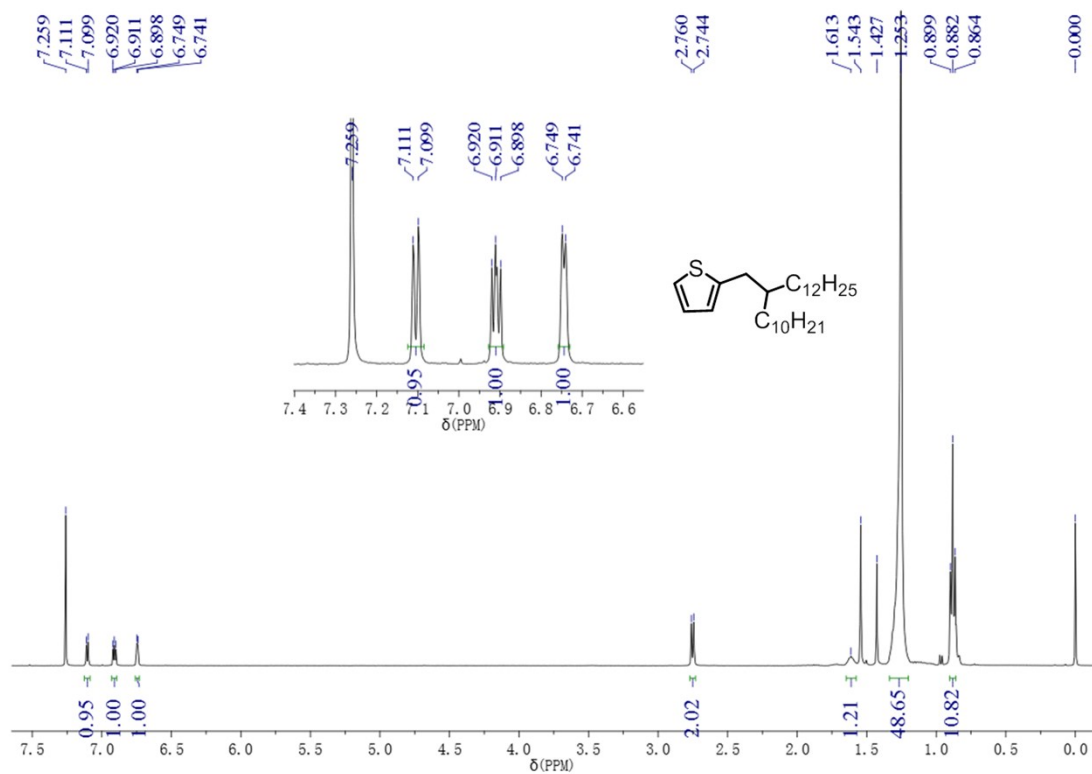

**Fig. S1** <sup>1</sup>H NMR spectra of 2-(2-decyltetradecyl)thiophene (**2**).

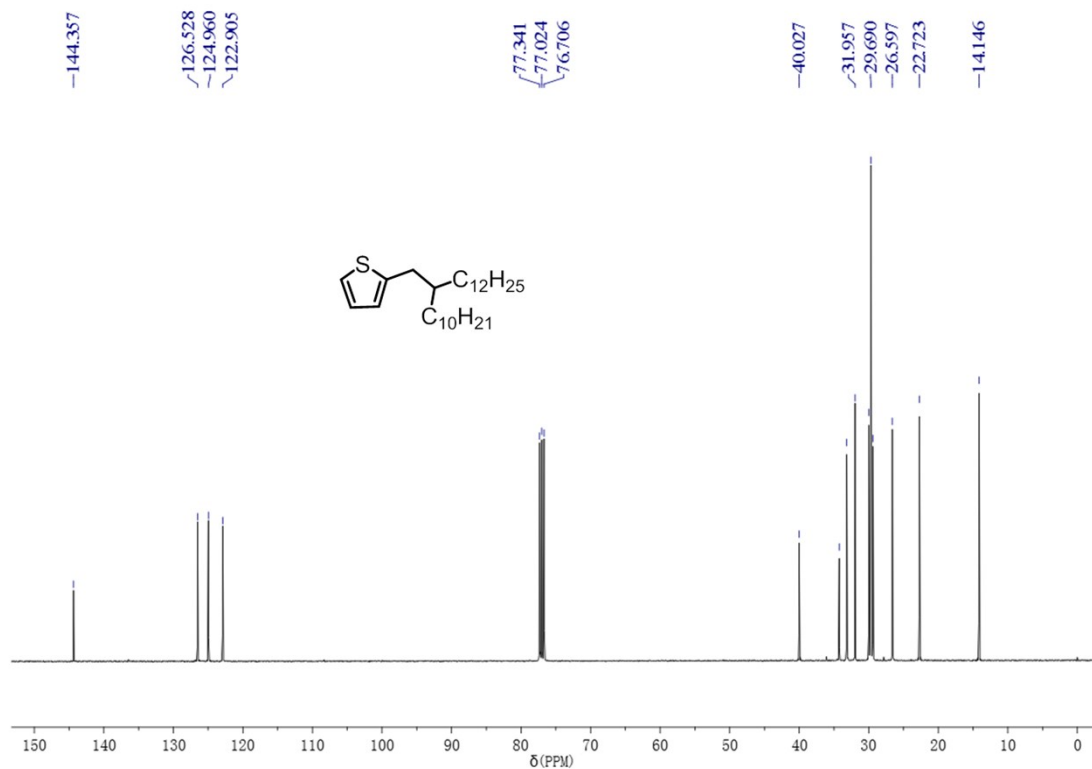

**Fig. S2** <sup>13</sup>C NMR spectra of 2-(2-decyltetradecyl)thiophene (**2**).

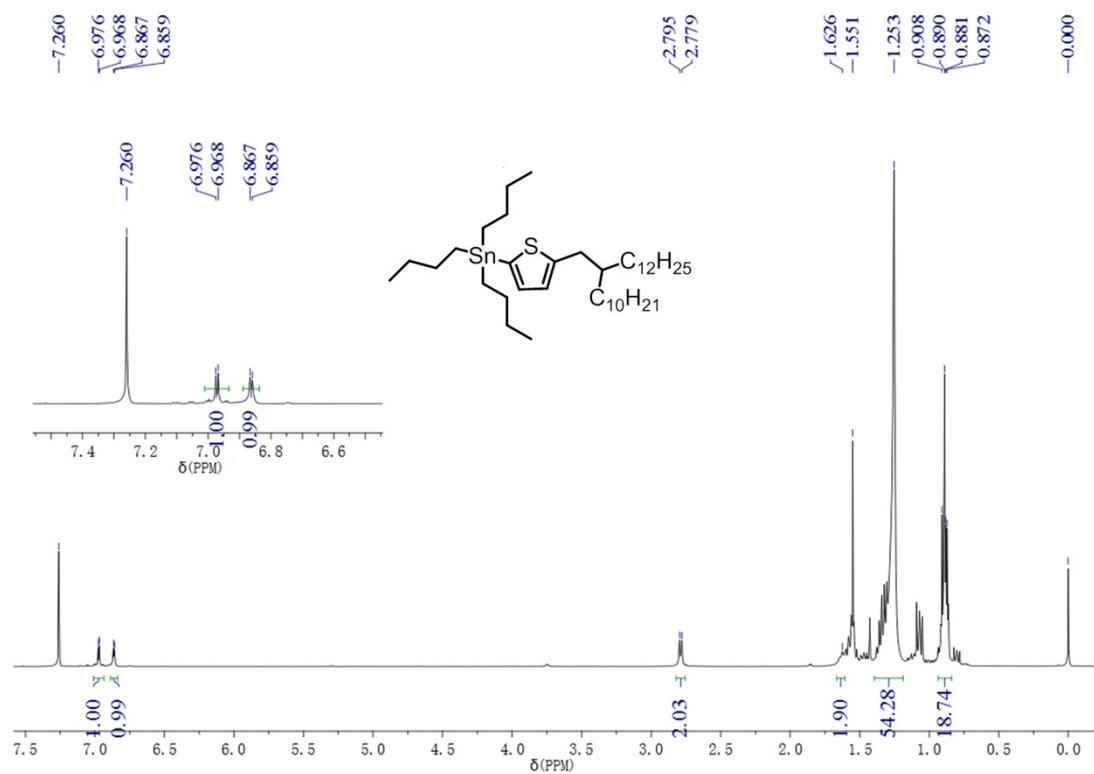

**Fig. S3** <sup>1</sup>H NMR spectra of tributyl(5-(2-decyltetradecyl)thiophen-2-yl)stannane (**3**).

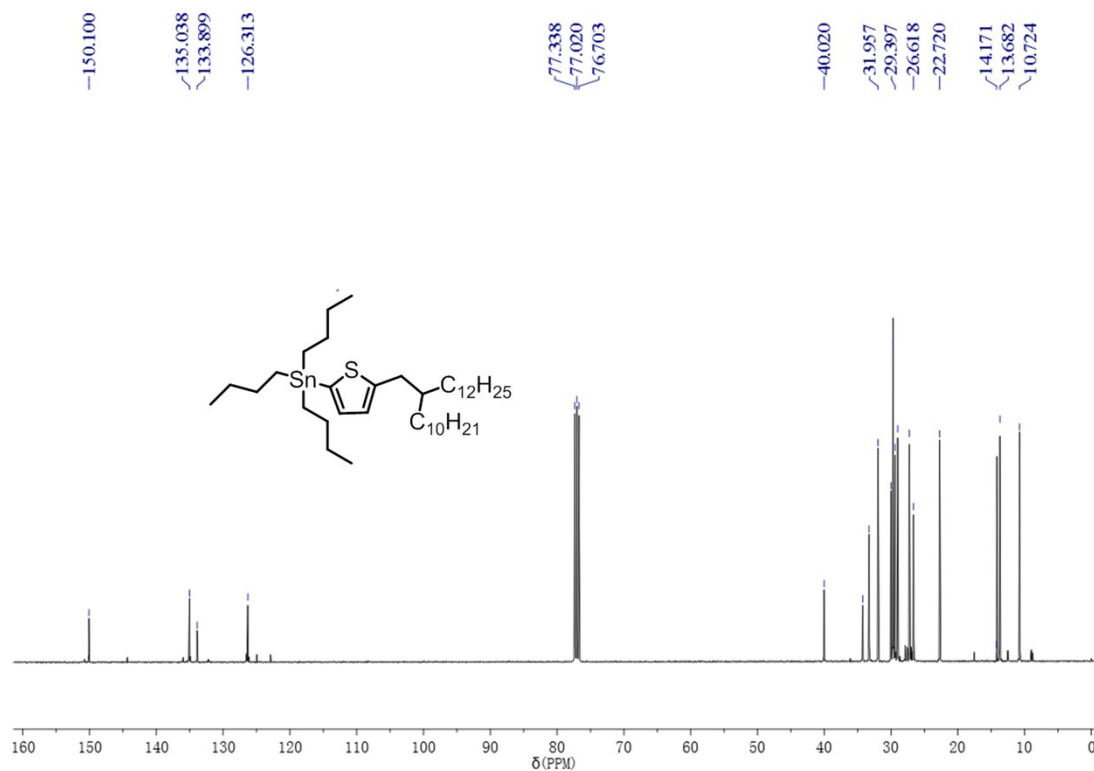

**Fig. S4** <sup>13</sup>C NMR spectra of tributyl(5-(2-decyltetradecyl)thiophen-2-yl)stannane (**3**).

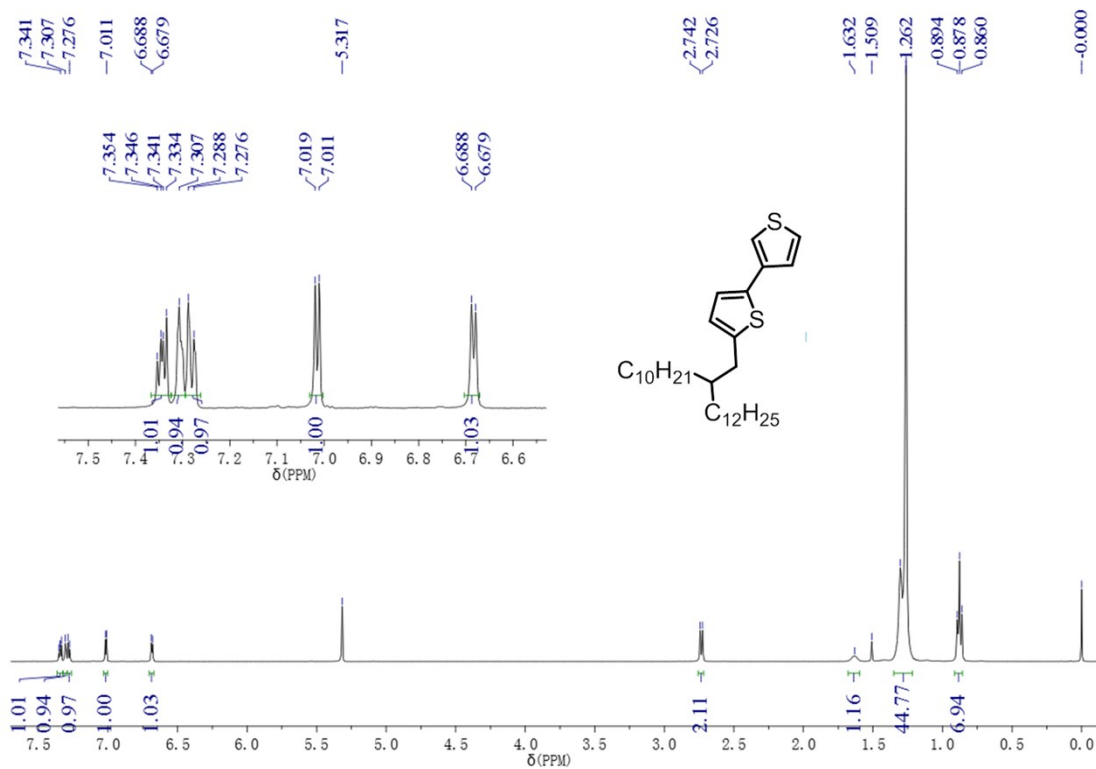

**Fig. S5**  $^1H$  NMR spectra of 5-(2-decyltetradecyl)-2,3'-bithiophene (4).

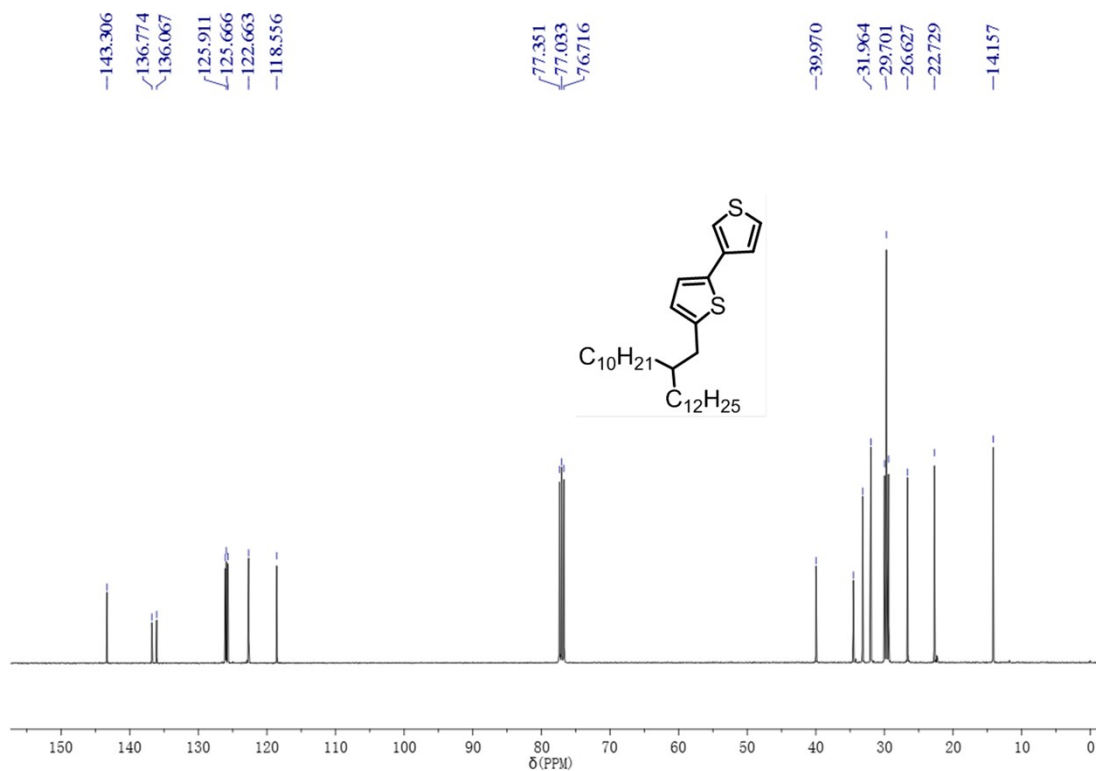

**Fig. S6**  $^{13}C$  NMR spectra of 5-(2-decyltetradecyl)-2,3'-bithiophene (4).



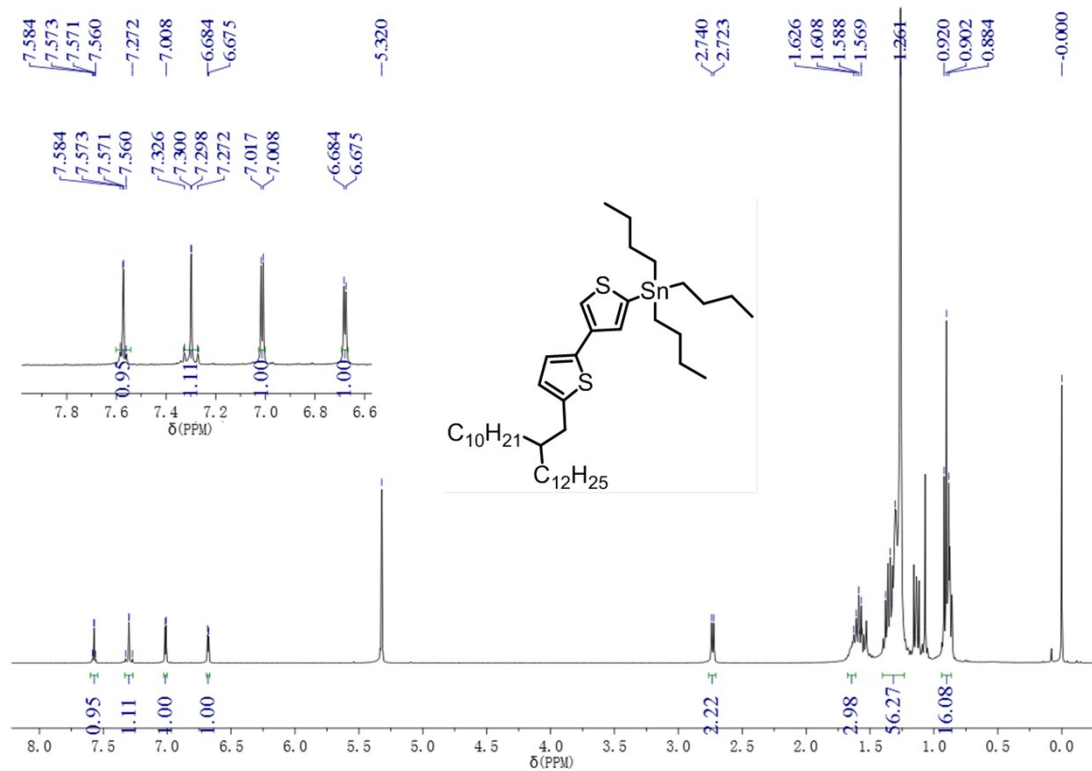

**Fig. S7**  $^1\text{H}$  NMR spectra of (5-(2-decyltetradecyl)-[2,3'-bithiophen]-5'-yl)trimethylstannane (5).

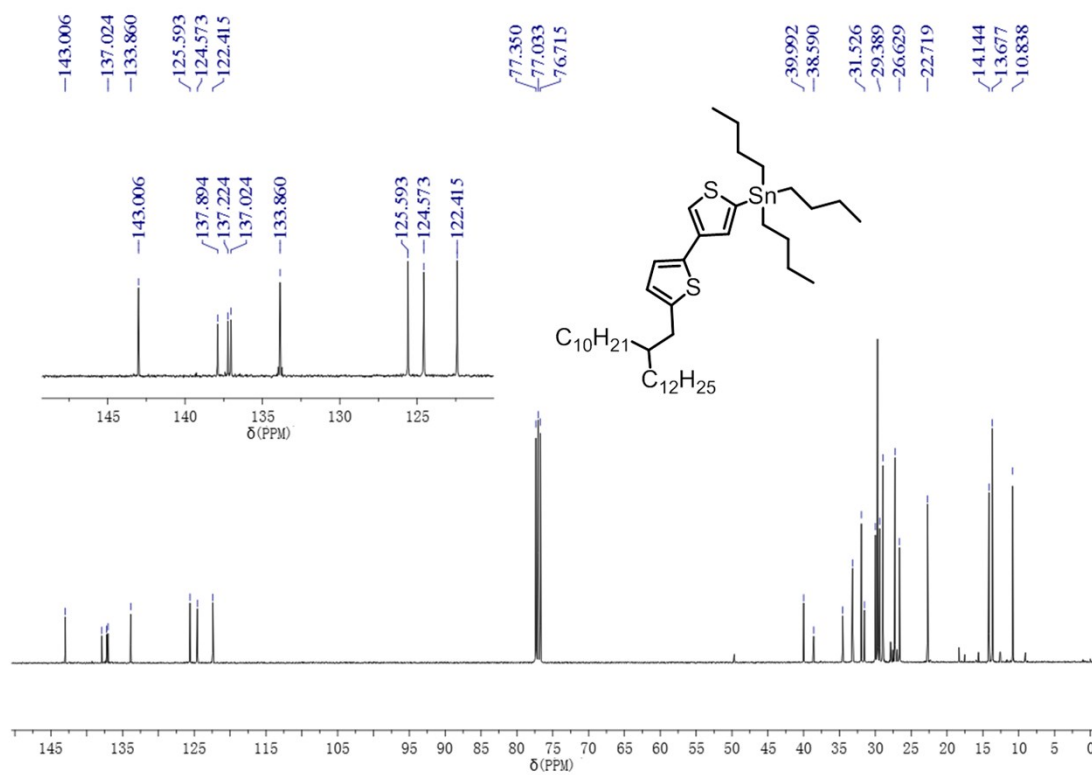

**Fig. S8**  $^{13}\text{C}$  NMR spectra of (5-(2-decyltetradecyl)-[2,3'-bithiophen]-5'-yl)trimethylstannane (5).

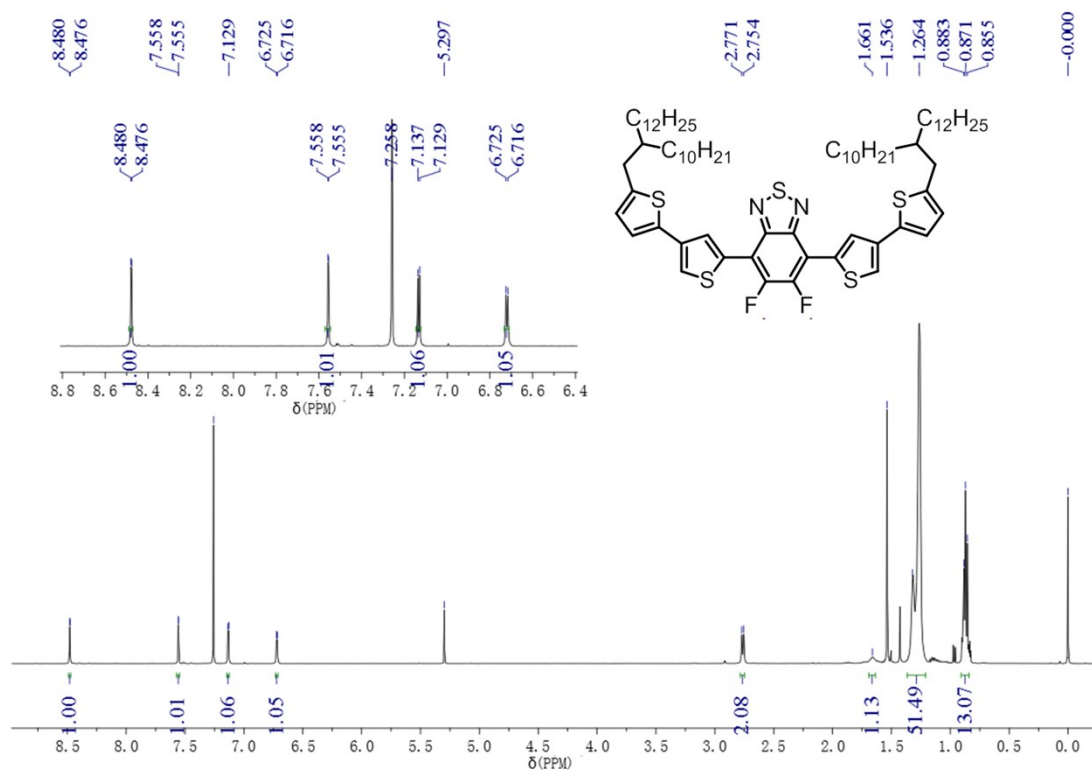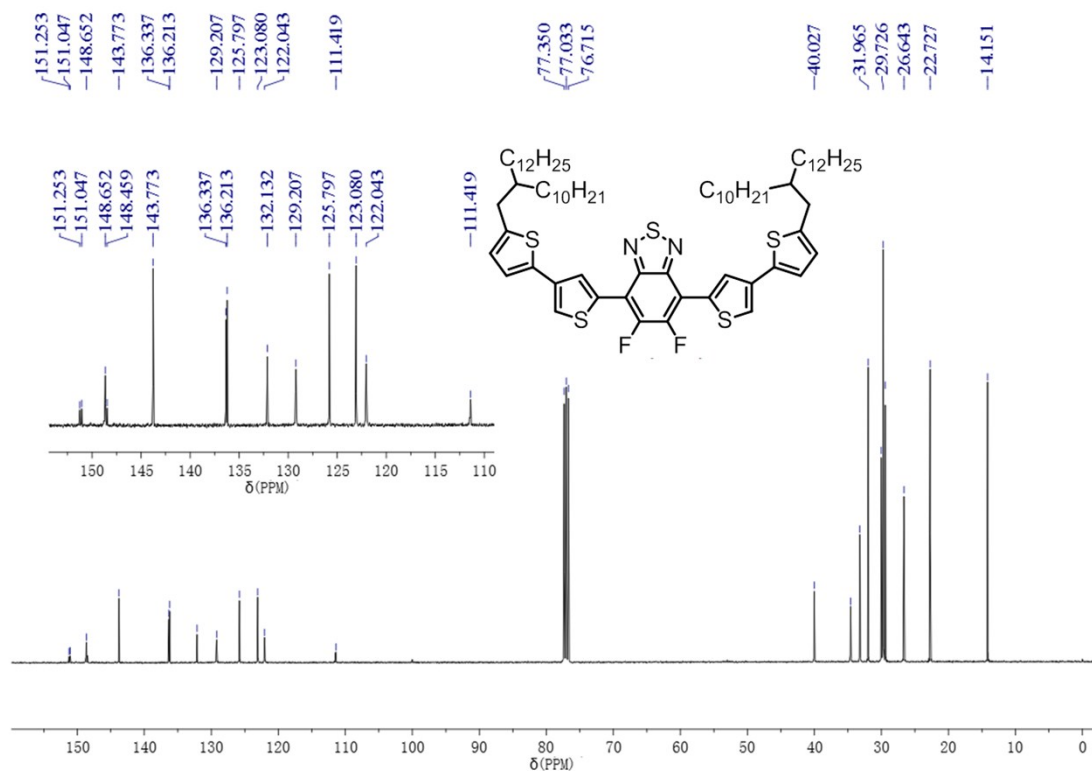

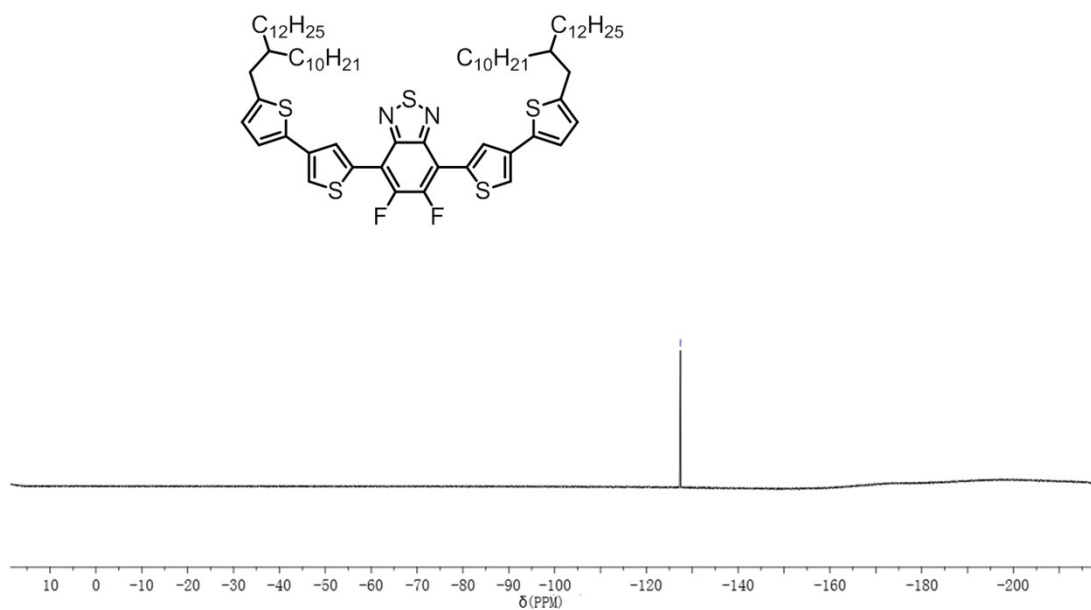

**Fig. S11**  $^{19}\text{F}$  NMR spectra of 4,7-bis(5-(2-decyltetradecyl)-[2,3'-bithiophen]-5'-yl)-5,6-difluorobenzo[c][1,2,5]thiadiazole (6).

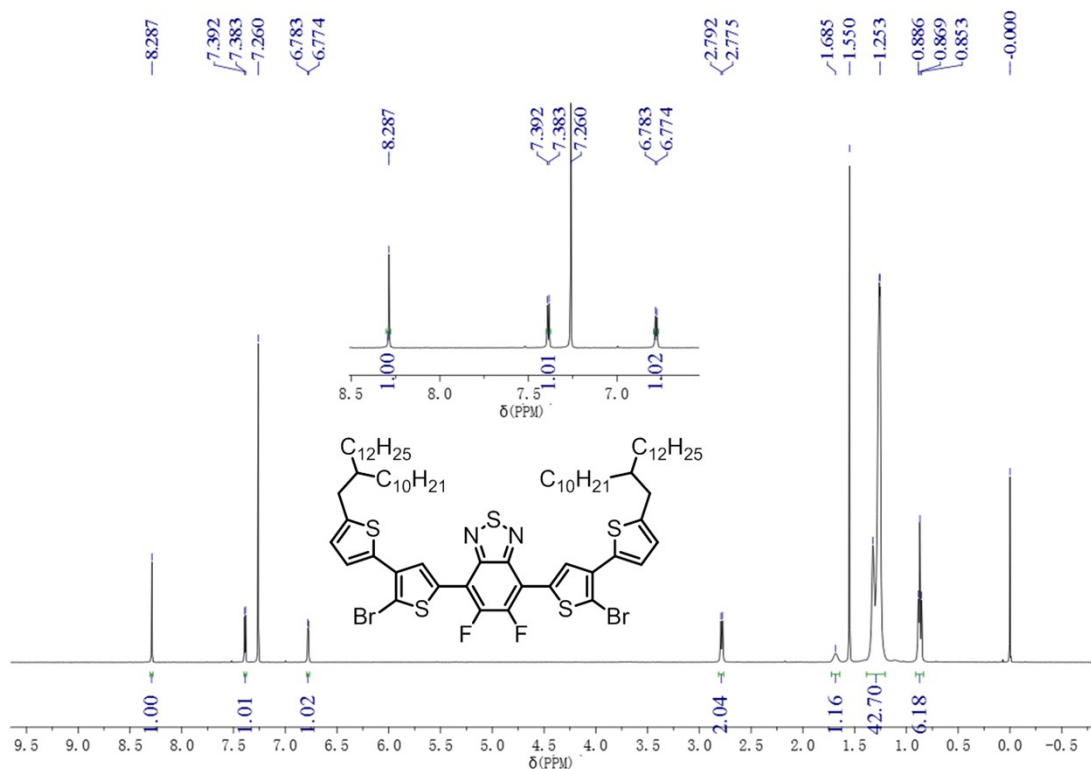

**Fig. S12**  $^1\text{H}$  NMR spectra of 4,7-bis(2'-bromo-5-(2-decyltetradecyl)-[2,3'-bithiophen]-5'-yl)-5,6-difluorobenzo[c][1,2,5]thiadiazole (7).

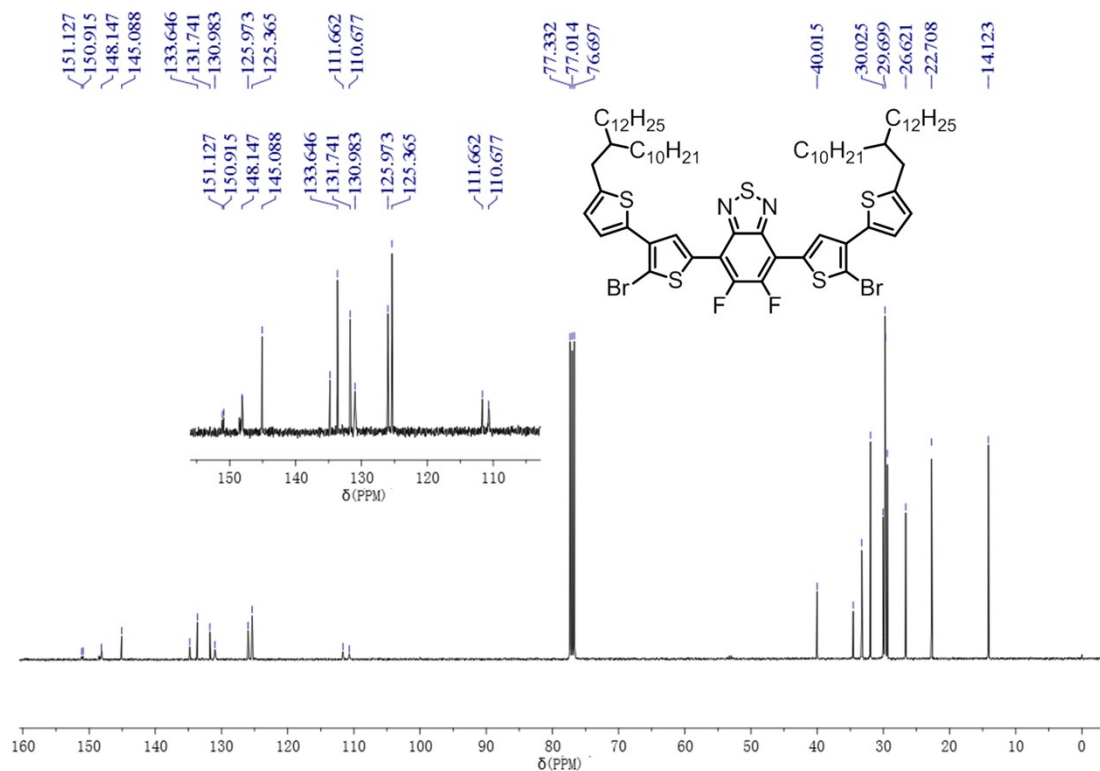

**Fig. S13**  $^{13}\text{C}$  NMR spectra of 4,7-bis(2'-bromo-5-(2-decyltetradecyl)-[2,3'-bithiophen]-5'-yl)-5,6-difluorobenzo[c][1,2,5]thiadiazole (**7**).

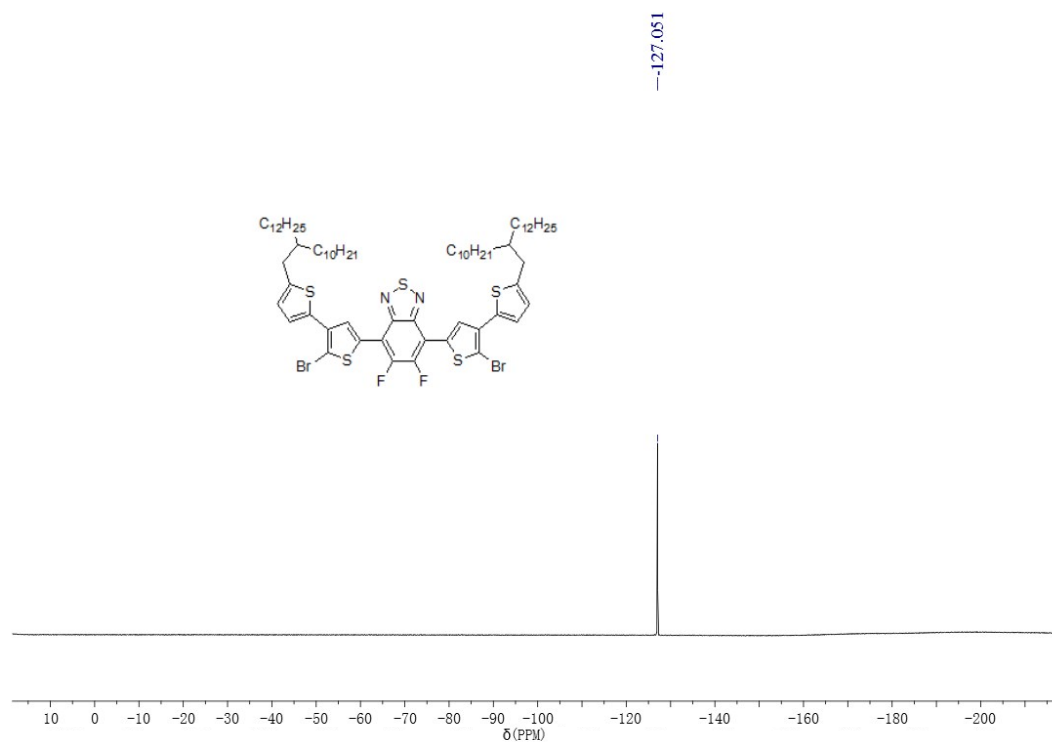

**Fig. S14**  $^{19}\text{F}$  NMR spectra of 4,7-bis(2'-bromo-5-(2-decyltetradecyl)-[2,3'-bithiophen]-5'-yl)-5,6-difluorobenzo[c][1,2,5]thiadiazole (**7**).



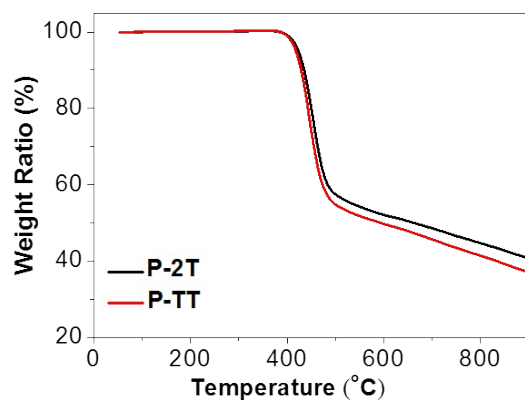

**Fig. S17** TGA curves of the polymers in nitrogen with a heating rate of 10 °C/min.

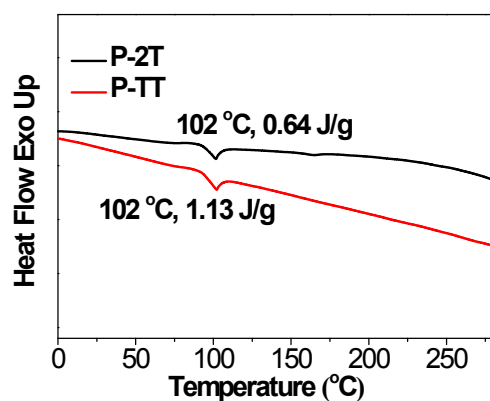

**Fig. S18** DSC curves of the polymers: in nitrogen with a heating/cooling rate of 10 °C/min.

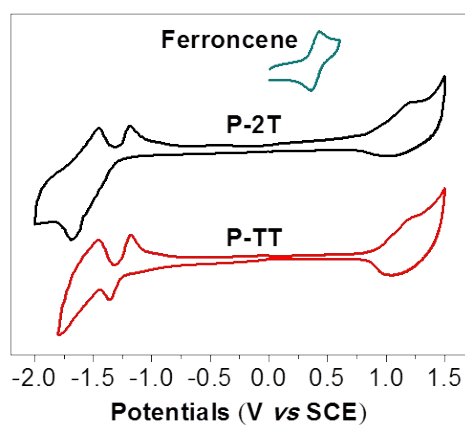

**Fig. S19** Thin film cyclic voltammograms (CV) of the polymers.

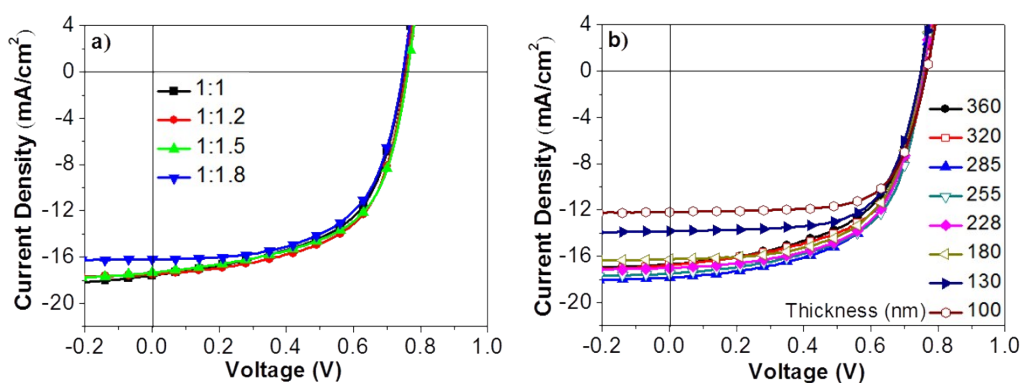

**Fig. S20**  $J$ - $V$  curves of **P-2T** based PSC devices at different a) donor-acceptor ratio and b) active layer thickness.

**Table S1** The detailed photovoltaic performances of the solar cells based on **P-2T**:PC<sub>71</sub>BM with different D:A ratio (wt:wt) and active layer thickness. The solvent was *o*-DCB.

| D:A ratio | Thickness (nm) | $J_{sc}$ (mA/cm <sup>2</sup> ) | $V_{oc}$ (V) | FF    | $PCE_{max}$ ( $PCE_{ave}$ ) <sup>a</sup> (%) |
|-----------|----------------|--------------------------------|--------------|-------|----------------------------------------------|
| 1:1       | 288            | 17.57                          | 0.75         | 57.3% | 7.55 (7.39)                                  |
| 1:1.5     | 271            | 17.34                          | 0.76         | 58.9% | 7.76 (7.47)                                  |
| 1:1.8     | 242            | 16.20                          | 0.75         | 60.2% | 7.31 (7.16)                                  |
| 1:1.2     | 360            | 16.69                          | 0.75         | 56.7% | 7.10 (6.94)                                  |
|           | 320            | 16.78                          | 0.76         | 58.0% | 7.40 (7.22)                                  |
|           | 285            | 17.83                          | 0.76         | 58.1% | 7.87 (7.61)                                  |
|           | 255            | 17.48                          | 0.76         | 59.5% | 7.91 (7.69)                                  |
|           | 228            | 17.01                          | 0.75         | 61.0% | 7.78 (7.54)                                  |
|           | 180            | 16.26                          | 0.76         | 61.4% | 7.48 (7.14)                                  |
|           | 130            | 13.82                          | 0.75         | 66.3% | 6.88 (6.75)                                  |
|           | 100            | 12.18                          | 0.77         | 68.8% | 6.45 (6.30)                                  |

<sup>a</sup>) The values in parentheses stand for the average PCEs from over 15 devices.

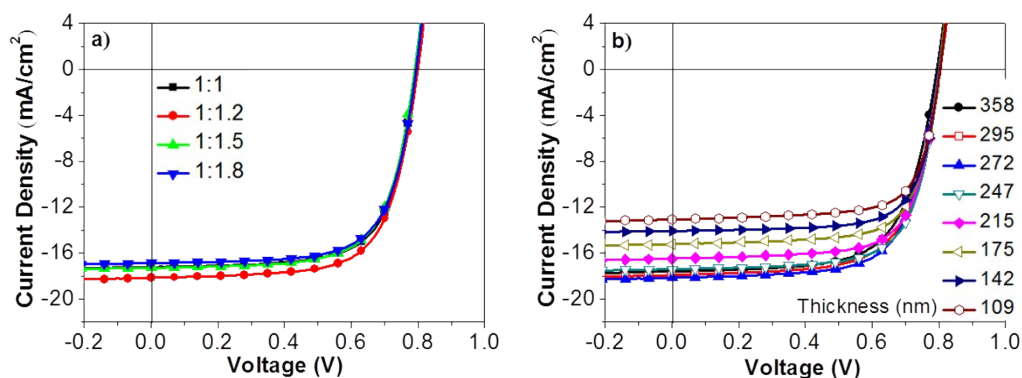

**Fig. S21**  $J$ - $V$  curves of P-TT based PSC devices at different a) donor-acceptor ratio and b) active layer thickness.

**Table S2** The detailed photovoltaic performances of the solar cells based on P-TT:PC<sub>71</sub>BM with different D:A ratio (wt:wt) and active layer thickness. The solvent was *o*-DCB.

| D:A ratio | Thickness (nm) | $J_{sc}$ (mA/cm <sup>2</sup> ) | $V_{oc}$ (V) | FF    | $PCE_{max}$ ( $PCE_{ave}$ ) <sup>a</sup> (%) |
|-----------|----------------|--------------------------------|--------------|-------|----------------------------------------------|
| 1:1       | 260            | 17.20                          | 0.79         | 69.7% | 9.47 (9.11)                                  |
| 1:1.5     | 254            | 17.11                          | 0.80         | 69.9% | 9.57 (9.33)                                  |
| 1:1.8     | 264            | 16.77                          | 0.79         | 69.6% | 9.22 (8.88)                                  |
| 1:1.2     | 358            | 17.60                          | 0.79         | 66.9% | 9.30 (8.90)                                  |
|           | 295            | 17.91                          | 0.80         | 67.7% | 9.70 (9.44)                                  |
|           | 272            | 18.15                          | 0.80         | 68.6% | 9.96 (9.58)                                  |
|           | 247            | 17.38                          | 0.80         | 70.7% | 9.83 (9.45)                                  |
|           | 215            | 16.48                          | 0.80         | 71.0% | 9.36 (9.04)                                  |
|           | 175            | 15.22                          | 0.80         | 71.8% | 8.74 (8.48)                                  |
|           | 142            | 14.06                          | 0.80         | 72.5% | 8.15 (7.93)                                  |
|           | 109            | 13.07                          | 0.80         | 72.8% | 7.61 (7.45)                                  |

<sup>a</sup>) The values in parentheses stand for the average PCEs from over 15 devices.



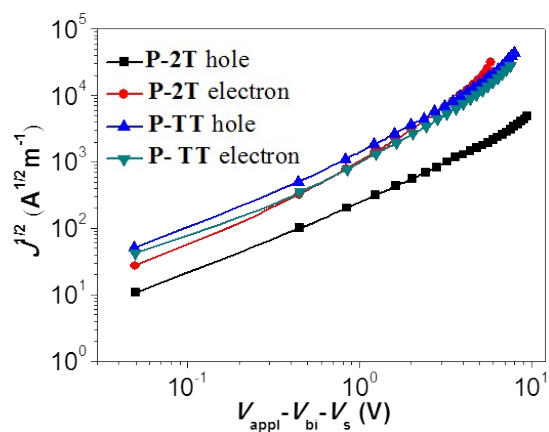

**Fig. S22** Dark current density versus effective voltage characteristics of hole- and electron-only devices, with photoactive layers based on blends **P-2T**:PC<sub>71</sub>BM and **P-TT**:PC<sub>71</sub>BM prepared from *o*-DCB.

**Table S3** Mobility results of space charge limited current (SCLC) devices based on **P-2T**:PC<sub>71</sub>BM and **P-TT**:PC<sub>71</sub>BM prepared from *o*-DCB.

| D:A                        | $\mu_h$<br>(cm <sup>2</sup> V <sup>-1</sup> s <sup>-1</sup> ) | $\mu_e$<br>(cm <sup>2</sup> V <sup>-1</sup> s <sup>-1</sup> ) | $\mu_h/\mu_e$ |
|----------------------------|---------------------------------------------------------------|---------------------------------------------------------------|---------------|
| P-2T : PC <sub>71</sub> BM | 1.24×10 <sup>-3</sup>                                         | 2.28×10 <sup>-3</sup>                                         | 0.54          |
| P-TT : PC <sub>71</sub> BM | 4.51×10 <sup>-3</sup>                                         | 3.44×10 <sup>-3</sup>                                         | 1.31          |

**Table S4** 2D-GIXD data of **P-2T** and **P-TT** neat and blend films.<sup>a</sup>

| Crystallographic parameters |                                          | <b>P-2T</b><br>neat     | <b>P-2T</b><br>blend | <b>P-TT</b><br>neat | <b>P-TT</b><br>blend |       |
|-----------------------------|------------------------------------------|-------------------------|----------------------|---------------------|----------------------|-------|
| Out-of-plane<br>direction   | Lamellar<br>packing (100)                | $q$ (nm <sup>-1</sup> ) | 2.38                 | 2.48                | N/A                  | 2.49  |
|                             |                                          | $d$ -spacing (Å)        | 26.40                | 25.34               | N/A                  | 25.23 |
|                             | $\pi$ - $\pi$ stacking<br>(010) or (020) | $q$ (nm <sup>-1</sup> ) | N/A                  | 17.78               | 17.40                | 17.60 |
|                             |                                          | $d$ -spacing (Å)        | N/A                  | 3.53                | 3.61                 | 3.57  |
| In-plane<br>direction       | Lamellar<br>packing (100)                | $q$ (nm <sup>-1</sup> ) | N/A                  | 2.22                | 2.04                 | 2.15  |
|                             |                                          | $d$ -spacing (Å)        | N/A                  | 28.30               | 30.80                | 29.22 |
|                             | $\pi$ - $\pi$ stacking<br>(010) or (020) | $q$ (nm <sup>-1</sup> ) | 17.62                | N/A                 | N/A                  | N/A   |
|                             |                                          | $d$ -spacing (Å)        | 3.57                 | N/A                 | N/A                  | N/A   |

<sup>a</sup>) N/A denotes not available

## References

- 1 X. Long, Z. Ding, C. Dou, J. Zhang, J. Liu and L. Wang, *Adv. Mater.*, 2016, **28**, 6504-6508.
